# Supplementary material for: Mechanistic study to reveal steric and electronic aspects involved in the formation of microstructures during Pd-catalyzed olefin/divinyl formal copolymerization: reactivity to catalyst choice
Source: Royal Society of Chemistry journal article supplement (doi:10.1039/d2cp05117f), 2023-01-01
Supplement: d2cp05117f1.pdf [file d2cp05117f1.pdf]

## 1 Supporting Information

2

### 3 Mechanistic study to reveal steric and electronic aspects involved 4 in the formation of microstructures during Pd catalyzed 5 olefin/divinyl formal copolymerization: Reactivity to catalyst 6 choice

7 Andleeb Mehmood<sup>a</sup>, Ayyaz Mahmood<sup>a</sup>, Xiaowei Xu<sup>b</sup>, Waseem Raza<sup>c</sup>, Shehzad Ahmed<sup>a</sup>, Naeem Ullah<sup>a</sup>, Yi  
8 Luo<sup>\*b,d</sup>, Xiaoqing Tian<sup>a\*</sup>

9 <sup>a</sup>. College of Physics and Optoelectronic Engineering, Shenzhen University, Shenzhen 518000, China

10 <sup>b</sup>. PetroChina Petrochemical Research Institute, Beijing 102206, China

11 <sup>c</sup>. Institute for Advanced Study, Shenzhen University, Shenzhen, Guangdong 518060, PR China

12 <sup>d</sup>. State Key Laboratory of Fine Chemicals, School of Chemical Engineering, Dalian University of  
13 Technology, Dalian 116024, China

14 \* Correspondence: [luoyi@dlut.edu.cn](mailto:luoyi@dlut.edu.cn), [xqtian@szu.edu.cn](mailto:xqtian@szu.edu.cn)

15

(a) *Trans mode insertion site  
for DVF in Catalyst (A)*

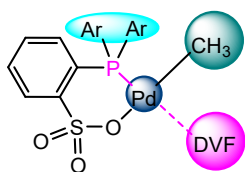

*Trans mode Catalyst*

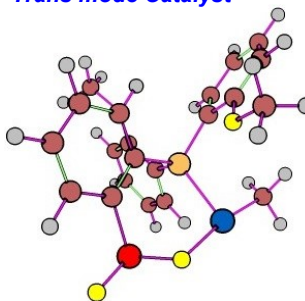

(b) *Cis mode insertion site  
for DVF in Catalyst (A)*

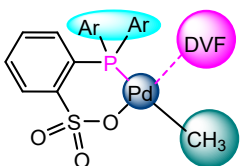

*Cis mode catalyst*

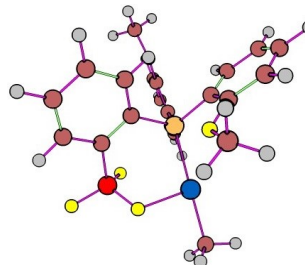

16

17 **Fig S1.** Two coordination manners (trans and cis, Ar = 2-MeOC<sub>6</sub>H<sub>4</sub>) of the Ethylene and DVF correspond  
18 to the P-atom of phosphine-sulfonate-based Pd complexes.

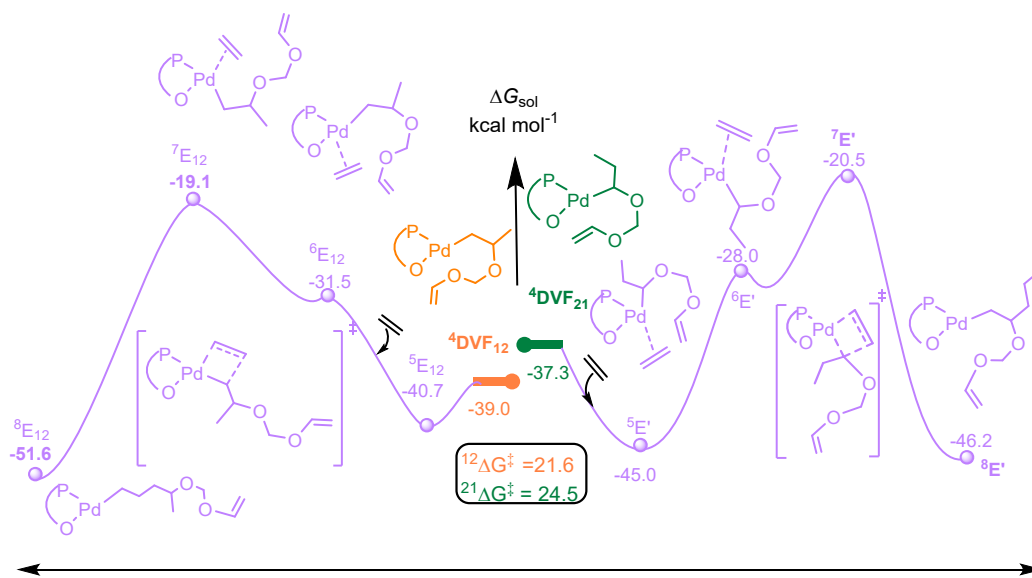

19

20 **Fig S2.** Energy profiles for chain propagation with E after 1,2/2,1-insertion of DVF in the 1,2/2,1-DVF pre-  
 21 insertion chains.

22

23 **Table S1** Computed energies for copolymerization and homo-polymerization steps. All coordination  
 24 complexes (**C**<sup>1</sup>, **C**<sup>2</sup>, **C**<sup>3</sup>, and **C**<sup>4</sup>) and transition states (**TS**<sup>1</sup> and **TS**<sup>2</sup>) of DVF homo-polymers.

| Monomer        | E/1,2/2,1                                                       | E/1,2/2,1             | E/1,2/2,               | E/1,2/2,              | E/1,2/2,1             | E/1,2/2,                                                        | E/1,2/2,              | E/1,2/2,               | E/1,2/2,1             | E/1,2/2,1              |
|----------------|-----------------------------------------------------------------|-----------------------|------------------------|-----------------------|-----------------------|-----------------------------------------------------------------|-----------------------|------------------------|-----------------------|------------------------|
|                | <b>C</b> <sup>1</sup>                                           | <b>C</b> <sup>2</sup> | <b>TS</b> <sup>1</sup> | <b>P</b> <sup>1</sup> | $\Delta G^{\ddagger}$ | <b>C</b> <sup>3</sup>                                           | <b>C</b> <sup>4</sup> | <b>TS</b> <sup>2</sup> | <b>P</b> <sup>2</sup> | $\Delta G^{2\ddagger}$ |
|                | <b>2<sup>nd</sup> insertion in <sup>4</sup>DVF<sub>12</sub></b> |                       |                        |                       |                       | <b>2<sup>nd</sup> insertion in <sup>4</sup>DVF<sub>21</sub></b> |                       |                        |                       |                        |
| <b>1,2-DVF</b> | -54.4                                                           | -42.4                 | -32.2                  | -54.2                 | <b>22.2</b>           | -55.7                                                           | -49.9                 | -32.6                  | -65.9                 | <b>23.1</b>            |
| <b>2,1-DVF</b> | -61.9                                                           | -49.2                 | -30.4                  | -66.5                 | <b>31.5</b>           | -59.5                                                           | -46.0                 | -26.4                  | -40.5                 | <b>33.1</b>            |

25

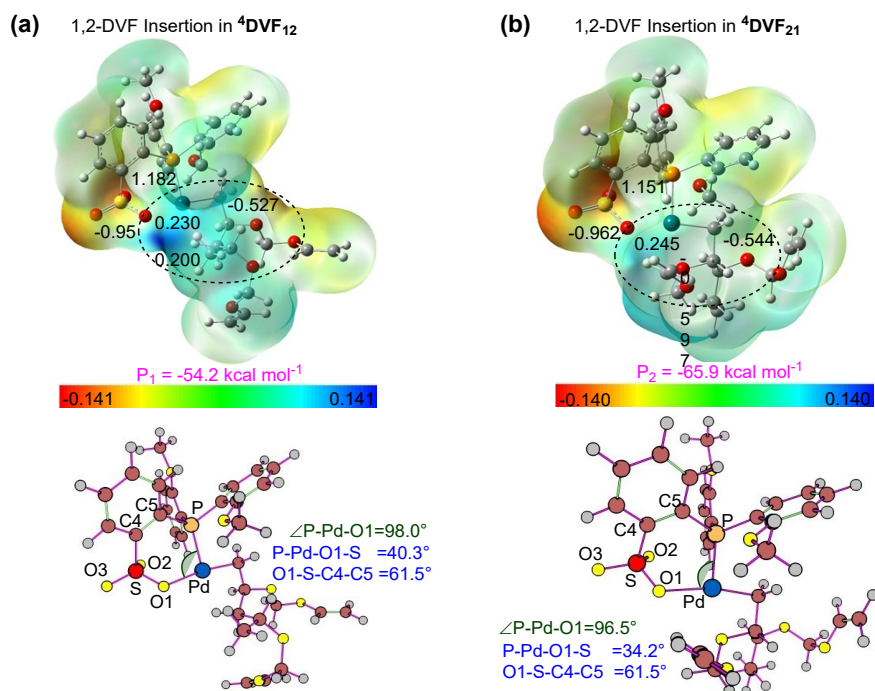

26

27 **Fig S3.** Molecular electrostatic potential (MEP) formed by mapping of total density over the electrostatic  
 28 potential of products (a) 1,2-DVF Insertion in  ${}^4\text{DVF}_{12}$ , (b) 1,2-DVF Insertion in  ${}^4\text{DVF}_{21}$  geometric parameter  
 29 analysis. Energies in  $\text{kcal mol}^{-1}$ , and angles in degree ( $^\circ$ ). NBO charges are also mentioned on important  
 30 atoms.

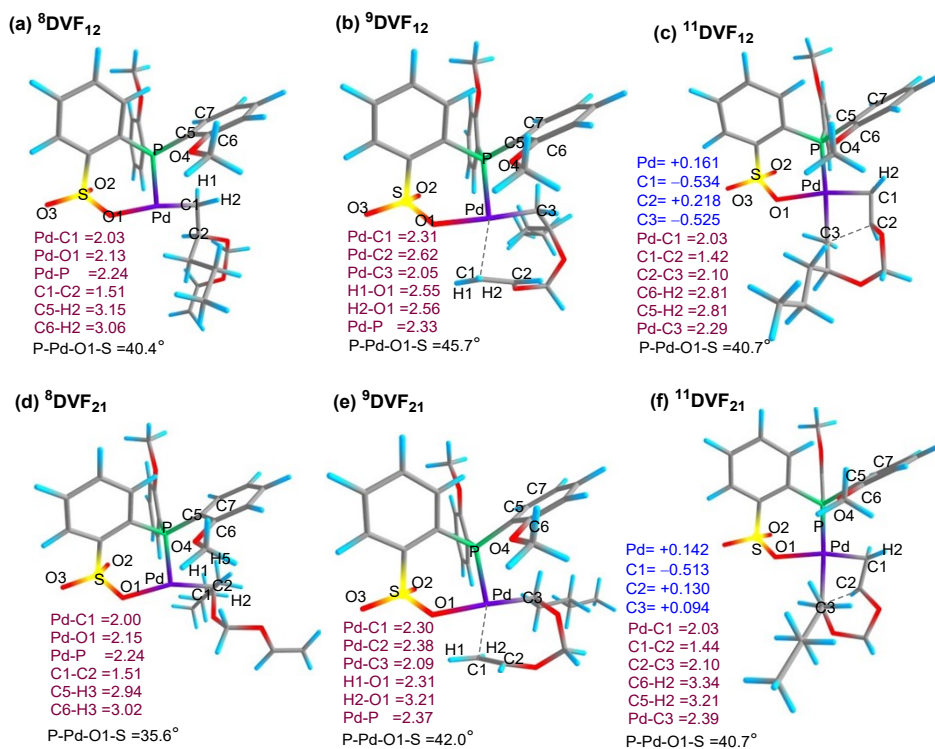

31

32 **Fig S4.** Geometrical analysis of (a)  ${}^8\text{DVF}_{12}$ , (b)  ${}^9\text{DVF}_{12}$ , (c)  ${}^{11}\text{DVF}_{12}$ , (d)  ${}^8\text{DVF}_{21}$ , (e)  ${}^9\text{DVF}_{21}$ , and (f)  
 33  ${}^{11}\text{DVF}_{21}$ . Bond distances in Å and dihedral angles in degree ( $^\circ$ ). Hydrogen atoms of the catalyst's ligand  
 34 have been omitted for clarity.

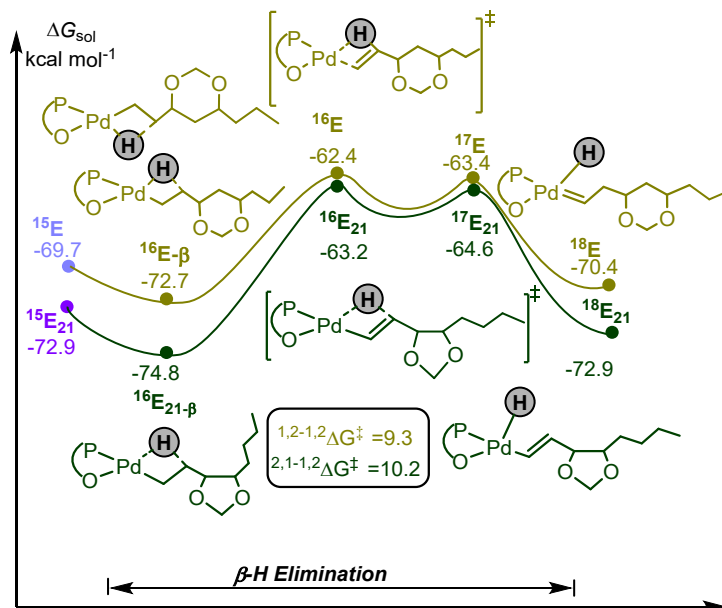

35  
36  
37  
38

**Fig S5.** Energy profiles for the  $\beta$ -hydride elimination after cyclization.

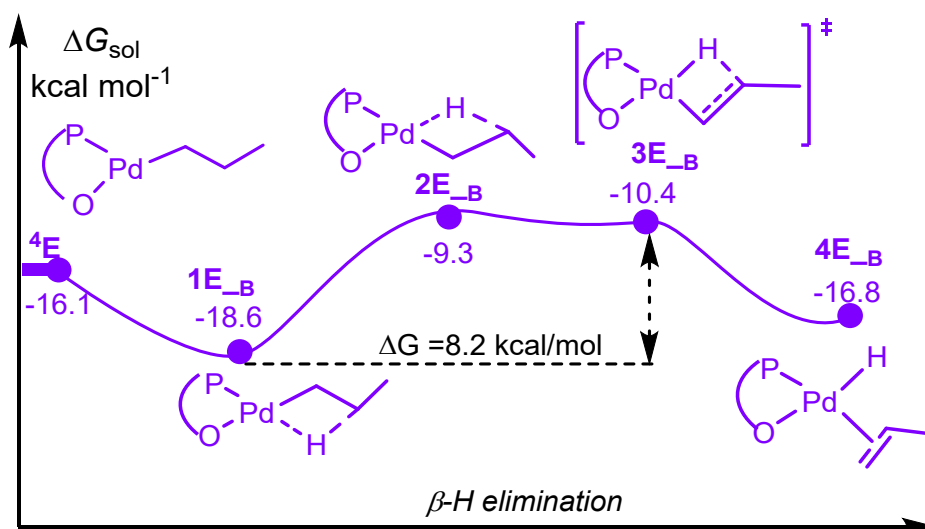

39  
40  
41  
42

**Fig S6.** Energy profiles for the  $\beta$ -hydride elimination after ethylene insertion.

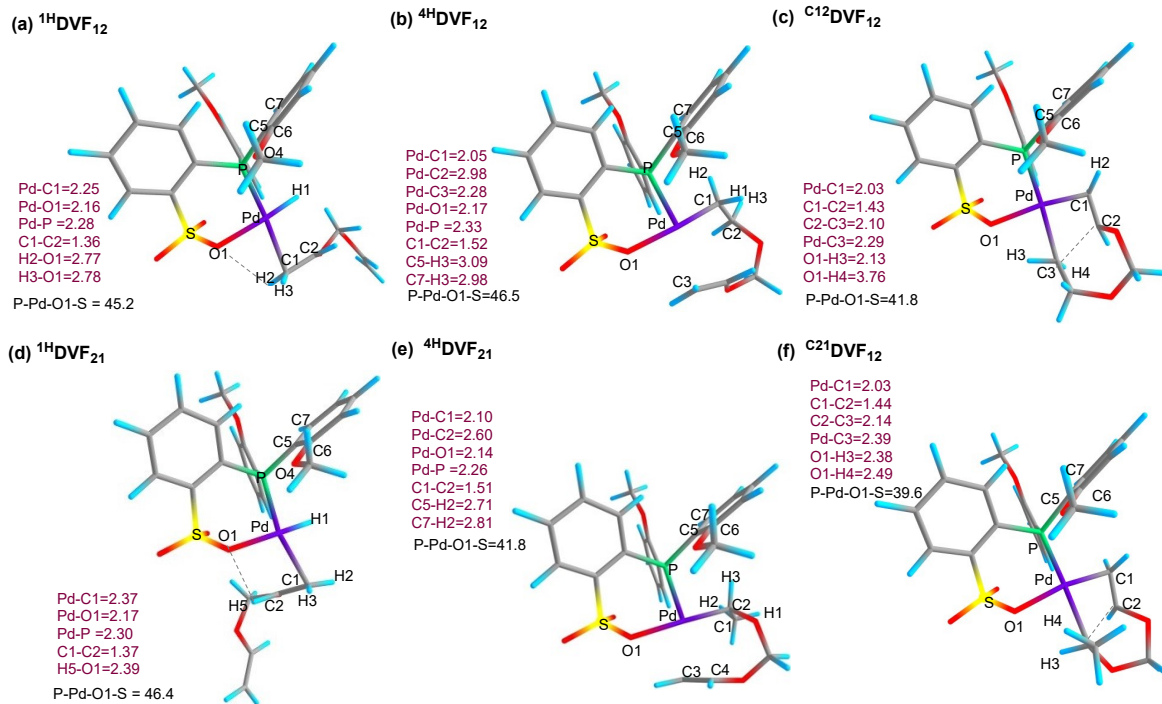

43  
44

45

46 **Fig S7.** Geometrical analysis of (a)  $^1\text{H DVF}_{12}$ , (b)  $^4\text{H DVF}_{12}$ , (c)  $^{12}\text{C DVF}_{12}$ , (d)  $^1\text{H DVF}_{21}$ , (e)  $^4\text{H DVF}_{21}$ , and (f)  
47  $^{21}\text{C DVF}_{12}$ . Bond distances in Å and dihedral angles in degree ( $^\circ$ ). Hydrogen atoms of the catalyst's ligand  
48 have been omitted for clarity.
